# Supplementary material for: Linear Optimal Runoff Aggregate (LORA): a global gridded synthesis runoff product
Source: Copernicus journal article supplement (doi:10.5194/hess-23-851-2019), 2019-02-13
Supplement: Supplementary file [file hess-23-851-2019-supplement.pdf]

Supplement of Hydrol. Earth Syst. Sci., 23, 851–870, 2019  
<https://doi.org/10.5194/hess-23-851-2019-supplement>  
© Author(s) 2019. This work is distributed under  
the Creative Commons Attribution 4.0 License.

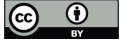

*Supplement of*

## **Linear Optimal Runoff Aggregate (LORA): a global gridded synthesis runoff product**

**Sanaa Hobeichi et al.**

*Correspondence to:* Sanaa Hobeichi (s.hobeichi@student.unsw.edu.au)

The copyright of individual parts of the supplement might differ from the CC BY 4.0 License.

**Table S1: Example of weights (w) and bias ratios (r) computed for the participating products over a range of river basins.**

|                | HBVS |       | HTESS1 |       | HTESS2 |       | JULES1 |       | JULES2 |      | LISF  |       | PCRG  |       | SURF2 |      | SURF1 |       | WGAP3 |       | W3RA  |       |
|----------------|------|-------|--------|-------|--------|-------|--------|-------|--------|------|-------|-------|-------|-------|-------|------|-------|-------|-------|-------|-------|-------|
|                | w    | r     | w      | r     | w      | r     | w      | r     | w      | r    | w     | r     | w     | r     | w     | r    | w     | r     | w     | r     | w     | r     |
| Amur           | 0.33 | -0.32 | -1.22  | -0.78 | 0.14   | -0.18 | -0.47  | -0.35 | -0.33  | 0.20 | 0.46  | 0.11  | 1.75  | 0.09  | 0.32  | 0.42 | 0.51  | -1.35 | -0.71 | -0.10 | 0.08  | -0.46 |
| Copper         |      |       | -0.35  | -0.42 | 0.59   | 0.02  |        |       |        |      | 0.14  | -0.18 | 0.89  | -0.19 |       |      | 0.84  | -0.01 | 0.07  | 0.03  | -1.02 | -0.20 |
| Indigirka      |      |       | -0.35  | -0.80 | 0.03   | 0.02  |        |       |        |      | 1.23  | -0.27 | 0.42  | -0.10 |       |      | 0.79  | -0.95 | -0.02 | -0.04 | -1.10 | -1.15 |
| Mississippi    |      |       | 0.33   | -0.14 | 0.02   | -0.45 |        |       |        |      | -0.09 | 0.39  | 0.31  | 0.28  |       |      | -0.13 | -0.06 | 0.25  | 0.02  | 0.30  | 0.24  |
| Murray-Darling |      |       | 1.01   | 0.75  | 0.08   | 0.74  |        |       |        |      | -0.12 | 0.91  | 0.01  | 0.93  |       |      | 0.08  | 0.81  | 0.34  | 0.40  | -0.41 | 0.84  |
| Olenek         |      |       | -0.35  | -0.76 | 0.08   | -0.12 |        |       |        |      | 2.07  | -0.16 | -0.95 | -0.18 |       |      | 0.28  | -0.70 | 0.10  | -0.03 | -0.22 | -0.83 |
| Parana         |      |       | 0.26   | 0.01  | 0.16   | -0.19 |        |       |        |      | -0.88 | 0.34  | 0.18  | 0.48  |       |      | 0.20  | -0.12 | 1.29  | 0.06  | -0.21 | 0.36  |
| Pechora        |      |       | -0.38  | -0.34 | 0.33   | -0.15 |        |       |        |      | 0.84  | -0.13 | 0.82  | -0.21 |       |      | -0.01 | -0.42 | -0.47 | -0.01 | -0.14 | -0.41 |
| Yenisei        |      |       | -0.71  | -0.71 | -0.10  | -0.21 |        |       |        |      | 2.20  | -0.09 | -0.96 | -0.09 |       |      | 0.52  | -0.65 | 0.39  | -0.01 | -0.33 | -0.72 |

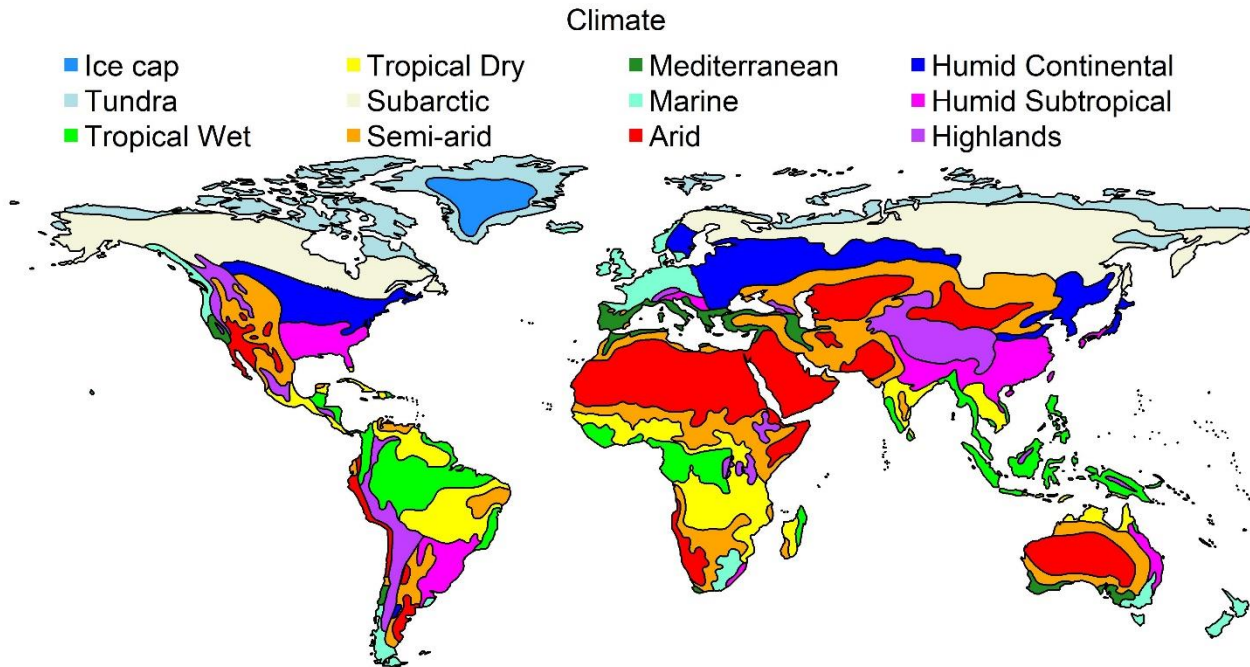

5 **Figure S1: Climate map used in this study (available from ArcGIS online). It is a simplified climate zones map consisting of 12 broad climate classes.**

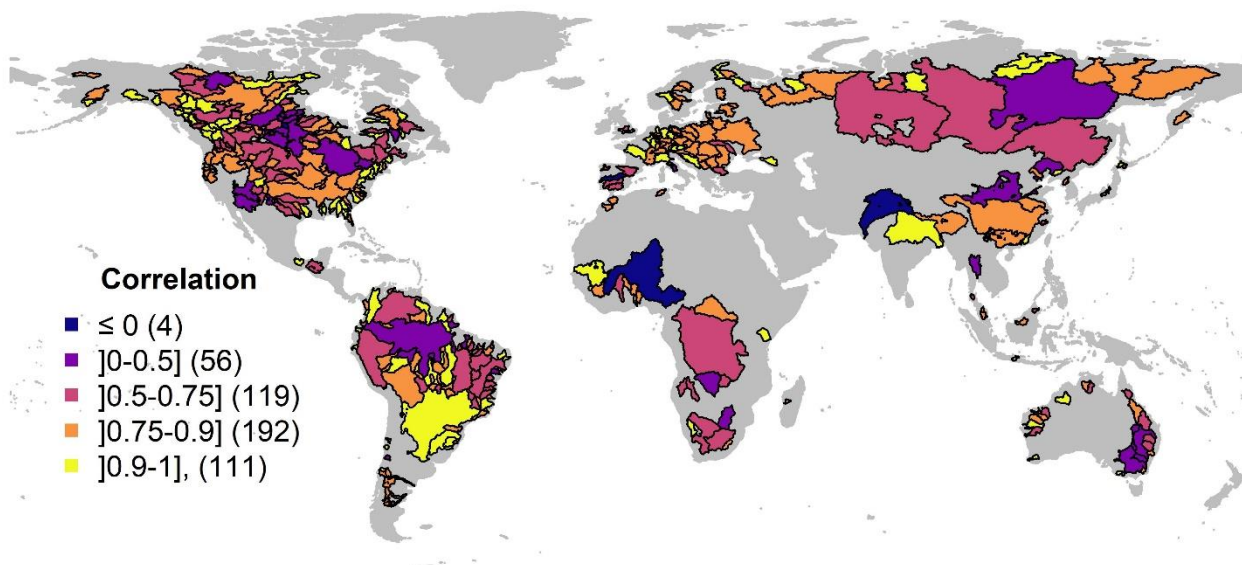

**Figure S2: Temporal correlation of LORA with the observed streamflow over the gauged basins. Basins are colour coded by correlation range and their numbers are given in brackets.**

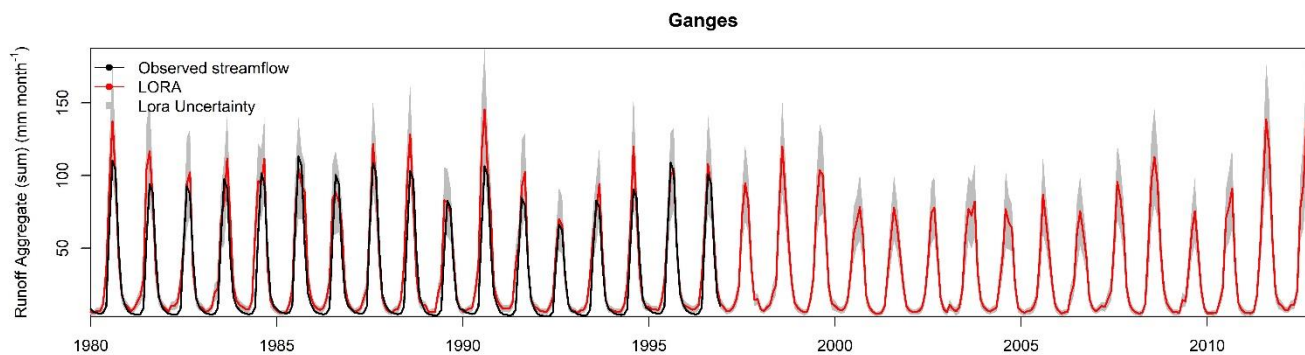

**5 Figure S3: observed streamflow (in black), LORA Runoff aggregate (in red), and its uncertainty range (grey) over the Ganges basin (in  $\text{mm month}^{-1}$ ). This basin was shown in yellow in Fig. S2, indicating that LORA exhibits a high temporal correlation ( $\geq 0.9$ ) with the observation.**

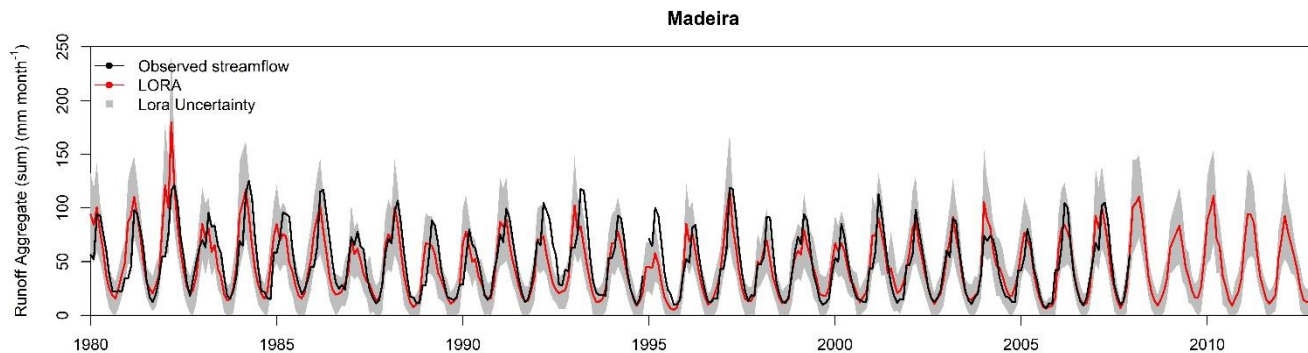

**Figure S4:** observed streamflow (in black), LORA Runoff aggregate (in red), and its uncertainty range (grey) over Madeira basin, i.e. a sub-basin of the Amazon (in  $\text{mm month}^{-1}$ ). This basin was shown in orange in Fig. S2, indicating that LORA exhibits a temporal correlation in the range  $[0.75 - 0.9]$  with the observation.

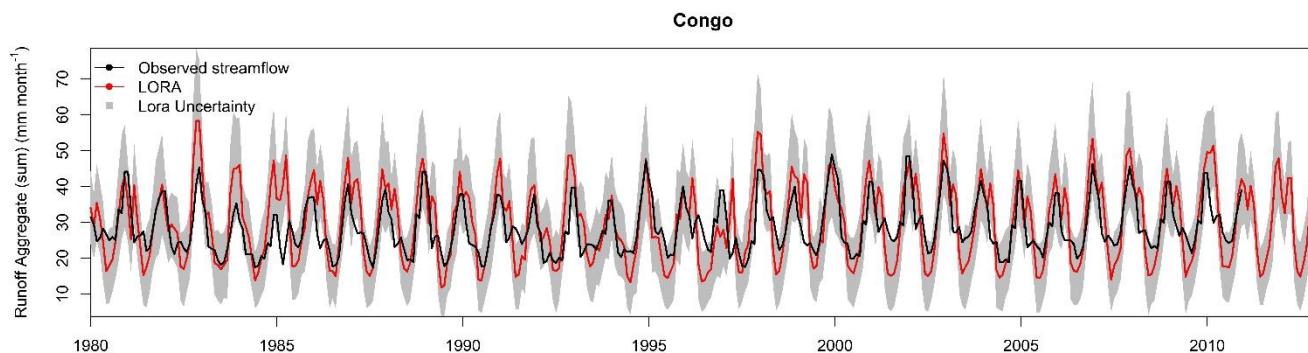

5

**Figure S5:** observed streamflow (in black), LORA Runoff aggregate (in red), and its uncertainty range (grey) over the Congo basin (in  $\text{mm month}^{-1}$ ). This basin was shown in violet in Fig. S2, indicating that LORA exhibits a temporal correlation in the range  $[0.5 - 0.75]$  with the observation.

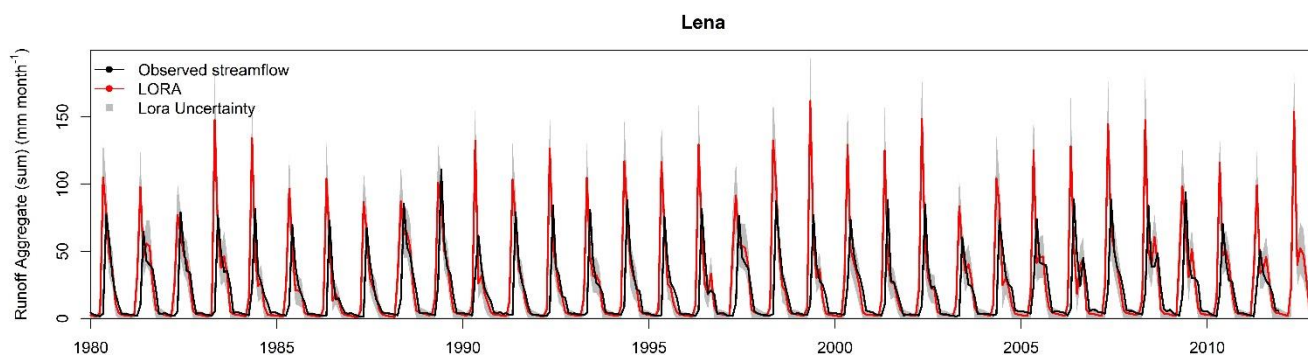

**Figure S6:** observed streamflow (in black), LORA Runoff aggregate (in red), and its uncertainty range (grey) over Lena basin (in  $\text{mm month}^{-1}$ ). This basin was shown in purple in Fig. S2, indicating that LORA exhibits low temporal correlation ( $\leq 0.5$ ) with the observation.

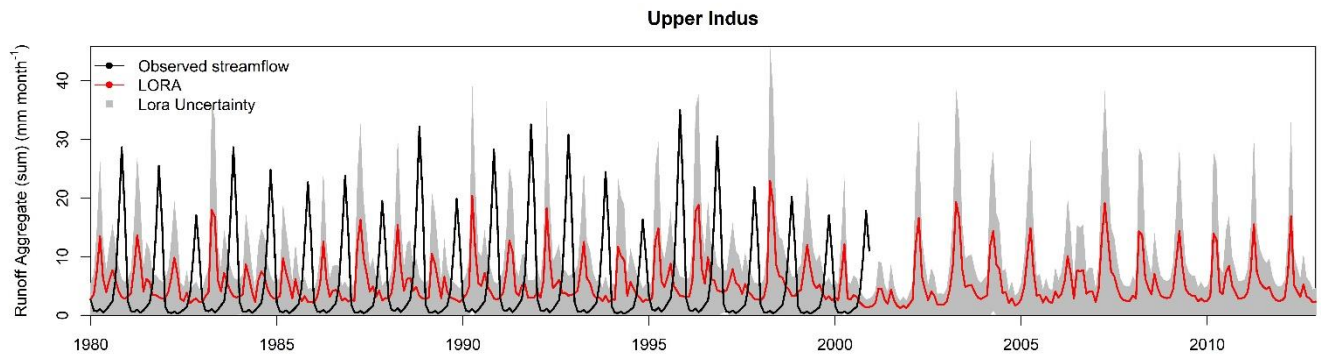

**Figure S7:** observed streamflow (in black), LORA Runoff aggregate (in red), and its uncertainty range (grey) over the upper Indus basin (in  $\text{mm month}^{-1}$ ). This basin was shown in dark blue in Fig. S2, indicating that LORA exhibits a negative temporal correlation with the observation.

5

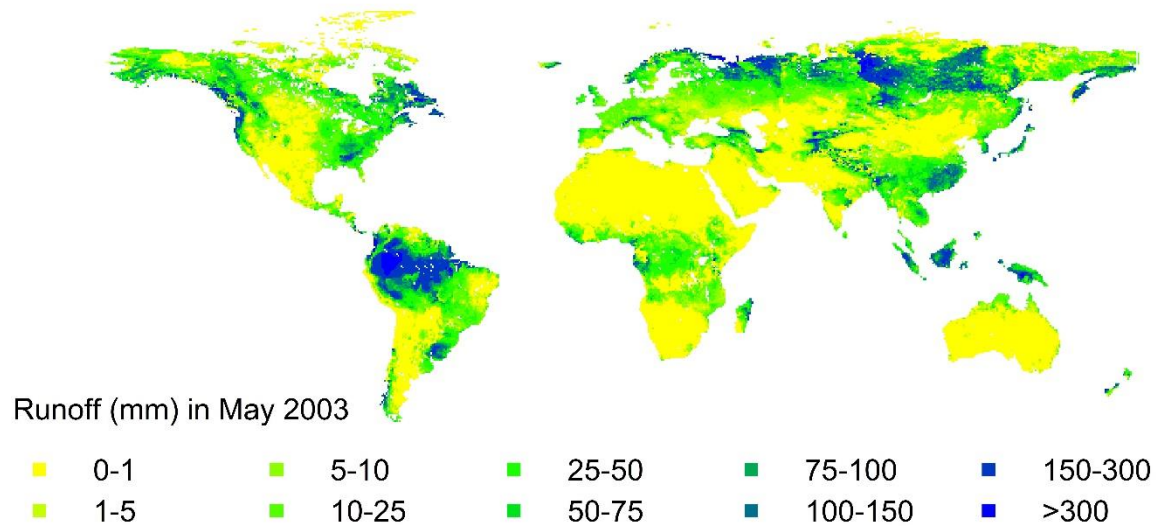

**Fig. S8:** Global map of LORA runoff fields (mm) in May 2003

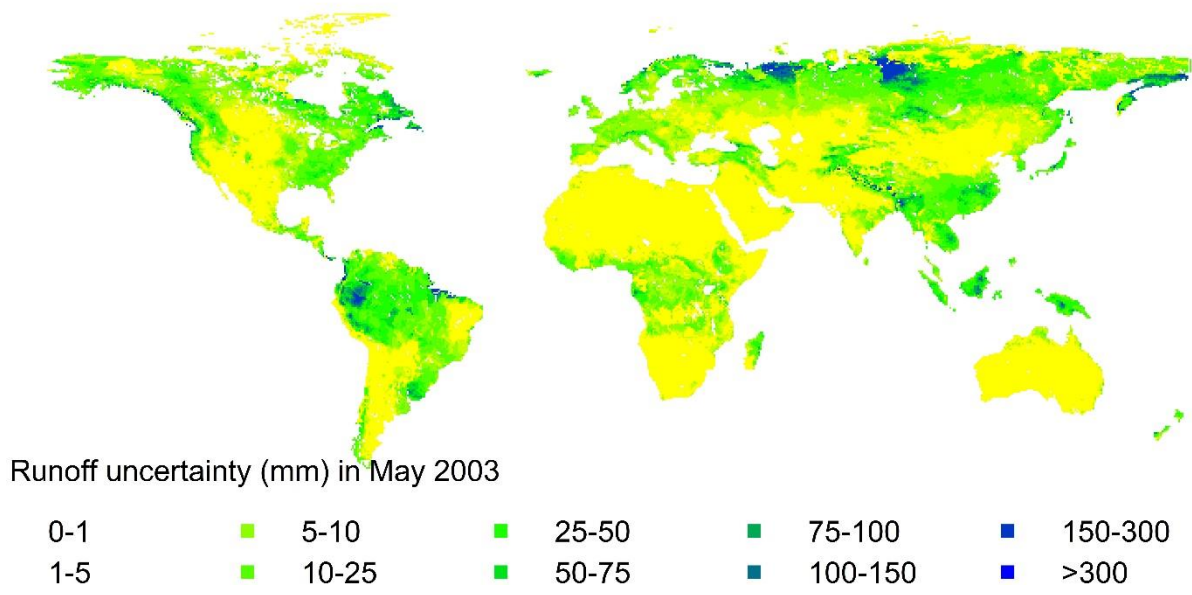

**Fig. S8: Global map of LORA uncertainty fields (mm) in May 2003**
